# Supplementary material for: Incidence and Etiology of Postharvest Fungal Diseases Associated with Bulb Rot in Garlic (Alllium sativum) in Spain
Source: MDPI journal article supplement (doi:10.3390/foods10051063), 2021-05-12
Supplement: s1 [file s1]

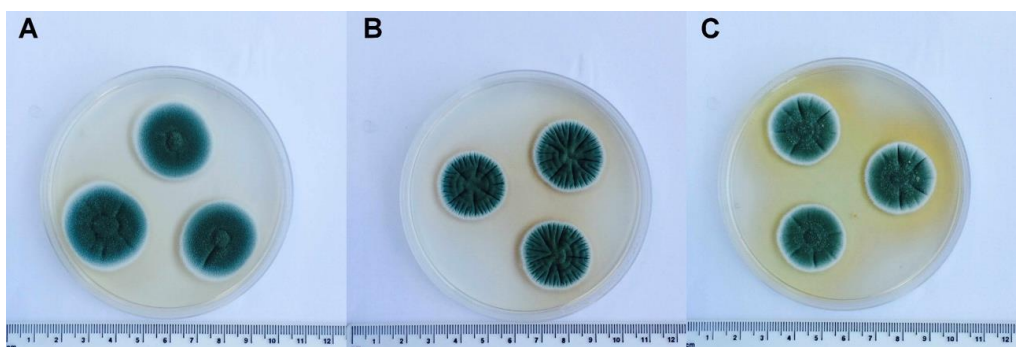

**Figure S1.** Morphotypes of *Penicillium allii* isolates from garlic in Spain after 7 days at 25 °C in the dark on Czapek yeast agar. (A) PA086, morphotype 1; (B) PA100, morphotype 2; (C) PA112, morphotype 3.

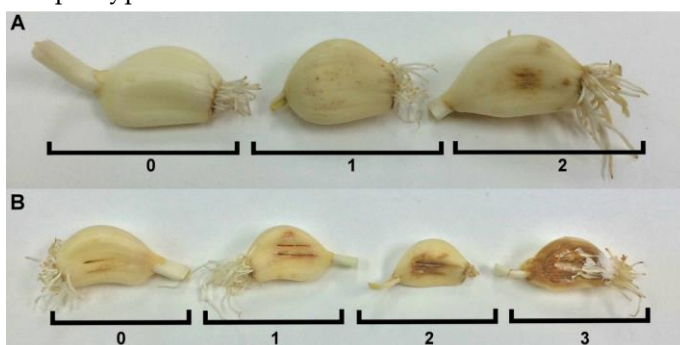

**Figure S2.** Disease severity index (DSI) scale (0–3) used to evaluate garlic clove rot for the pathogenicity test of *Fusarium* spp. on non-wounded (A) and artificially wounded garlic cloves (B).
